# Supplementary material for: Efficient synthesis of 6-membered cyclic monothiocarbonates from halohydrin and carbonyl sulfide
Source: Royal Society of Chemistry journal article supplement (doi:10.1039/d3cc01541f), 2023-01-01
Supplement: d3cc01541f1.pdf [file d3cc01541f1.pdf]

# Supporting Information

## Efficient Synthesis of 6-Membered Cyclic Monothiocarbonates from Halohydrin and Carbonyl Sulfide

Yang Li, ‡<sup>a</sup> Jianghui Li, ‡<sup>b</sup> Yingying Zhang, <sup>b</sup> Zizheng Fang <sup>\*a</sup> and

Chengjian Zhang <sup>\*b</sup>

<sup>a</sup> Hangzhou Global Scientific and Technological Innovation Center (HIC), Zhejiang University, Hangzhou 311200, China.

Email: [fangzizheng@zju.edu.cn](mailto:fangzizheng@zju.edu.cn)

<sup>b</sup> MOE Key Laboratory of Macromolecular Synthesis and Functionalization, Department of Polymer Science and Engineering, Zhejiang University, Hangzhou 310030, China.

Email: [chengjian.zhang@zju.edu.cn](mailto:chengjian.zhang@zju.edu.cn)

### List of contents

|                                                     |           |
|-----------------------------------------------------|-----------|
| <b>Fig. S1</b> .....                                | <b>S1</b> |
| <b>Fig. S2</b> .....                                | <b>S1</b> |
| <b>Fig. S3</b> .....                                | <b>S2</b> |
| <b>General Information</b> .....                    | <b>S2</b> |
| <b>General Experimental Procedure</b> .....         | <b>S3</b> |
| <b>Characterization Data for All Products</b> ..... | <b>S4</b> |
| <b>NMR Spectra for All the Compounds</b> .....      | <b>S7</b> |

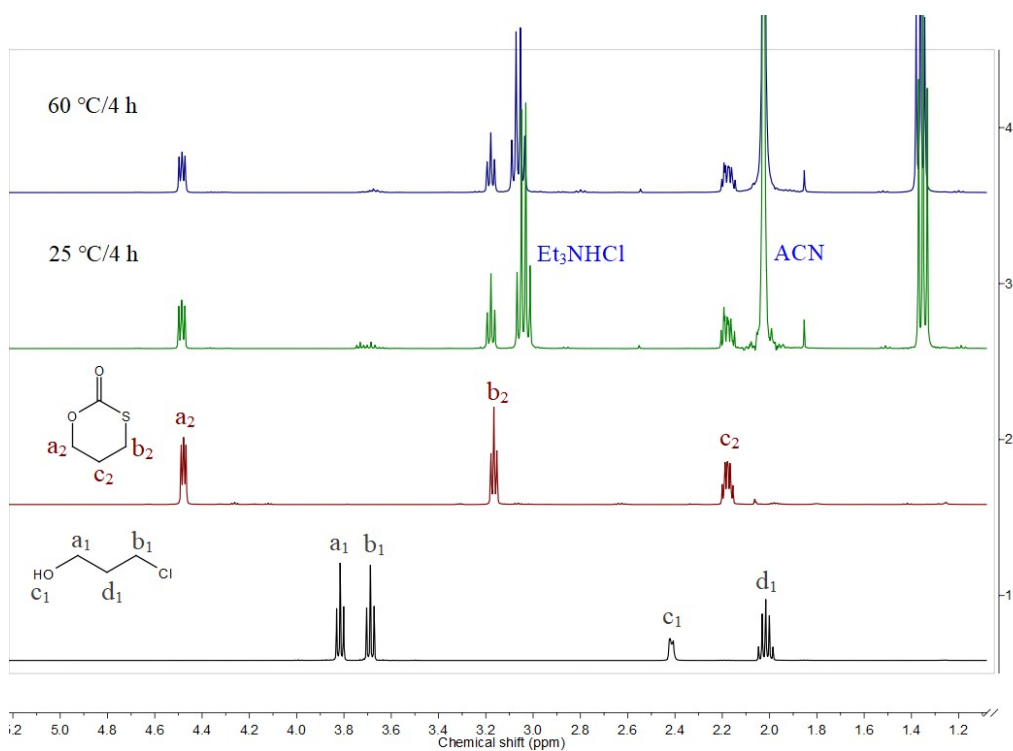

**Fig. S1** Stacked partial <sup>1</sup>H NMR spectra of 3-chloro-1-propanol, 1,3-oxathian-2-one (**1b**), crude products of Table 1 entries 1 and 3 in CDCl<sub>3</sub>.

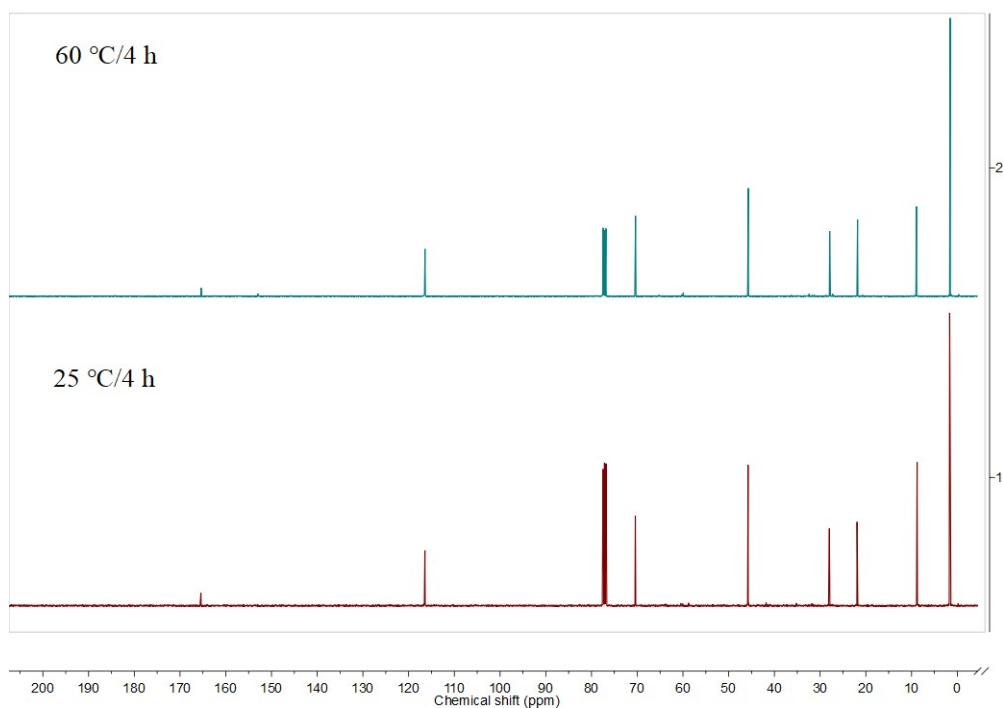

**Fig. S2** Stacked <sup>13</sup>C NMR spectra of the crude products of Table 1 entries 1 and 3 in CDCl<sub>3</sub>.

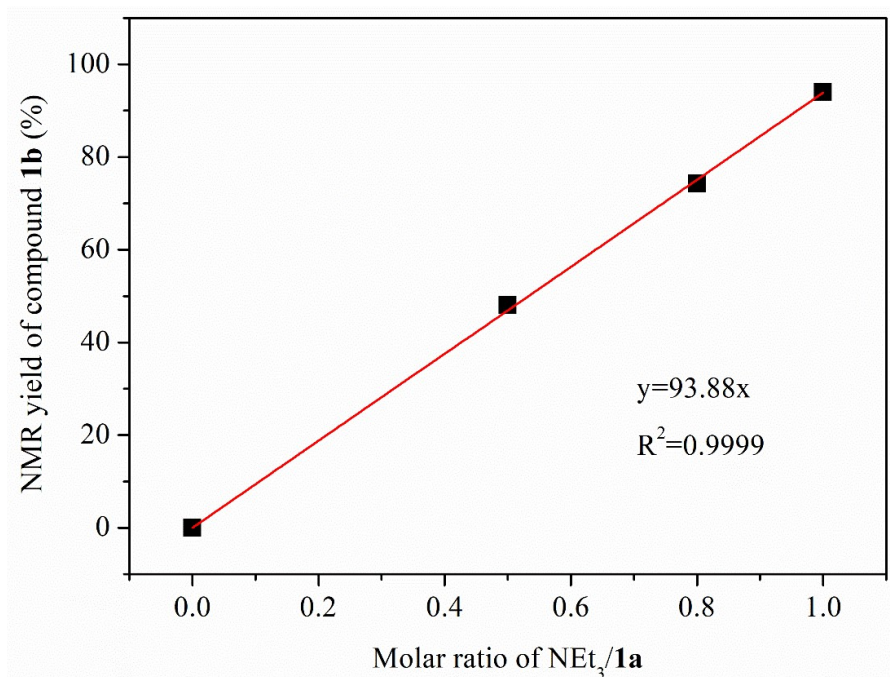

**Fig. S3** The relationship between the yield of **1b** and the amount of NEt<sub>3</sub>.

## General Information

<sup>1</sup>H and <sup>13</sup>C NMR spectra were recorded using a Bruker AVANCE III 600M spectrometer with chloroform-*d* (CDCl<sub>3</sub>) as solvent. The peaks were internally referenced to TMS (0.00 ppm). IR spectra were obtained using a ThermoFisher iS50 spectrometer. The data of HRMS was carried out on a high-resolution mass spectrometer (Agilent 6545 Q-TOF LC/MS). Unless otherwise noted, all reagents and solvents were purchased from commercial suppliers and used without further purification.

## General Experimental Procedure

### **General procedure for the preparation of 1,3-halohydrins**

The halogenating reaction of 1,3-diols were performed in a flask using gaseous HCl in the presence of adipic acid. In a typical experiment: 2-methylpropane-1,3-diol (100.0 g) and adipic acid (5.0 g) were added into a 250 mL three-necked flask with a magnetic stirrer. The flask was placed in an oil bath and heated to 120 °C. Then gaseous HCl produced by adding concentrated sulfuric acid dropwise to sodium chloride (15~20 drops per minute) was introduced into the flask for 10 hours. After reaction, the mixture was cooled to room temperature and neutralized with sodium carbonate, and was filtered. The filtrate was then distilled in vacuum to give the target product 3-chloro-2-methyl-1-propanol (**3a**, collecting fractions at 70~75 °C, 42.1 g, 35% yield).

### **General procedure for the reaction of COS with 1,3-halohydrins**

The coupling reactions of carbonyl sulfide (COS) and 1,3-halohydrins were performed in a 10 mL autoclave equipped with a magnetic stirrer and a pressure gauge. In a typical experiment, 3-chloro-1-propanol (0.47 g, 5 mmol), triethylamine (0.56 g, 5.5 mmol), and acetonitrile (3.5 mL, [**1a**] ~1 M) were added into the autoclave. Then COS (0.6 g, 10 mmol) was purged into the sealed autoclave and quantified by weighting. The reaction was carried out at 25 °C for 10 h with continuous stirring. Then, the autoclave was cooled, and excess COS was released. The residue was purified by

fractional distillation or column chromatography to give the corresponding 6-membered cyclic thiocarbonates.

### Characterization Data for All Products

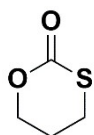

1,3-oxathian-2-one (**1b/2b**). White solid.  $^1\text{H}$  NMR (600 MHz,  $\text{CDCl}_3$ ):  $\delta$  4.50-4.45 (m, 2H), 3.16 (t,  $J = 6.3$  Hz, 2H), 2.21-2.14 (m, 2H).  $^{13}\text{C}$  NMR (151 MHz,  $\text{CDCl}_3$ ):  $\delta$  165.5, 70.5, 28.2, 22.2. IR: 1686, 1660, 1434, 1396, 1215, 1120, 1071, 999, 857, 640  $\text{cm}^{-1}$ . HRMS (ESI):  $[\text{M} + \text{Na}]^+$  calcd for  $\text{C}_4\text{H}_6\text{O}_2\text{S}$ : 140.9981; found: 140.9981.

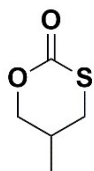

5-methyl-1,3-oxathian-2-one (**3b**). Colorless liquid.  $^1\text{H}$  NMR (600 MHz,  $\text{CDCl}_3$ ):  $\delta$  4.36 (s, 1H), 4.17 (s, 1H), 3.12 (d,  $J = 11.6$  Hz, 1H), 2.93 (s, 1H), 2.34 (s, 1H), 1.14 (s, 3H).  $^{13}\text{C}$  NMR (151 MHz,  $\text{CDCl}_3$ ):  $\delta$  165.7, 75.3, 34.5, 26.9, 15.7. IR: 1671, 1457, 1439, 1109, 1022, 999, 945, 869, 745, 701  $\text{cm}^{-1}$ . HRMS (ESI):  $[\text{M} + \text{Na}]^+$  calcd. for  $\text{C}_5\text{H}_8\text{O}_2\text{S}$ : 155.0137; found: 155.0136.

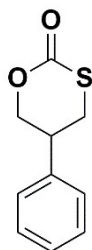

5-phenyl-1,3-oxathian-2-one (**4b**). White solid.  $^1\text{H}$  NMR (600 MHz,  $\text{CDCl}_3$ ):  $\delta$  7.39 (dd,  $J = 8.4, 6.8$  Hz, 2H), 7.36-7.31 (m, 1H), 7.25 (dd,  $J = 8.2, 6.4$  Hz, 2H), 4.59-4.48 (m, 2H), 3.49 (t,  $J = 11.4$  Hz, 1H), 3.42 (tt,  $J = 11.3, 9.9, 3.8$  Hz, 1H), 3.20 (ddd,  $J = 11.4, 4.5, 2.4$  Hz, 1H).  $^{13}\text{C}$  NMR (151 MHz,  $\text{CDCl}_3$ ):  $\delta$  165.3, 137.9, 129.4, 128.4, 127.2, 74.3, 38.8, 33.8. IR: 1666, 1454, 1289, 1119, 1048, 1011, 850, 773, 729, 692  $\text{cm}^{-1}$ . HRMS (ESI):  $[\text{M} + \text{Na}]^+$  calcd for  $\text{C}_{10}\text{H}_{10}\text{O}_2\text{S}$ : 217.0294; found: 217.0296.

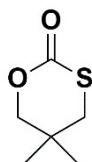

5,5-dimethyl-1,3-oxathian-2-one (**5b**). White solid.  $^1\text{H}$  NMR (600 MHz,  $\text{CDCl}_3$ ):  $\delta$  4.09 (s, 2H), 2.94 (s, 2H), 1.20 (s, 6H).  $^{13}\text{C}$  NMR (151 MHz,  $\text{CDCl}_3$ ):  $\delta$  165.8, 79.0, 40.3, 28.4, 23.7. IR: 1666, 1465, 1439, 1379, 1309, 1283, 1125, 1107, 1016, 919  $\text{cm}^{-1}$ . HRMS (ESI):  $[\text{M} + \text{Na}]^+$  calcd for  $\text{C}_6\text{H}_{10}\text{O}_2\text{S}$ : 169.0294; found: 169.0294.

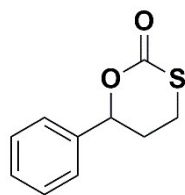

6-phenyl-1,3-oxathian-2-one (**6b**). White solid.  $^1\text{H}$  NMR (600 MHz,  $\text{CDCl}_3$ ):  $\delta$  7.43-7.39 (m, 2H), 7.39-7.34 (m, 3H), 5.43 (dd,  $J = 9.9, 2.0$  Hz, 1H), 3.31 (td,  $J = 11.5, 4.7$  Hz, 1H), 3.08 (dt,  $J = 11.9, 4.5$  Hz, 1H), 2.43 (dtd,  $J = 14.7, 4.5, 2.0$  Hz, 1H), 2.31-2.17 (m, 1H).  $^{13}\text{C}$  NMR (151 MHz,  $\text{CDCl}_3$ ):  $\delta$  165.9, 138.4, 128.9, 125.9, 82.8, 29.3, 27.0. IR: 1668, 1450, 1417, 1301, 1223, 1137, 1007, 923, 910, 749, 698  $\text{cm}^{-1}$ . HRMS (ESI):  $[\text{M} + \text{Na}]^+$  calcd for  $\text{C}_{10}\text{H}_{10}\text{O}_2\text{S}$ : 217.0294; found: 217.0295.

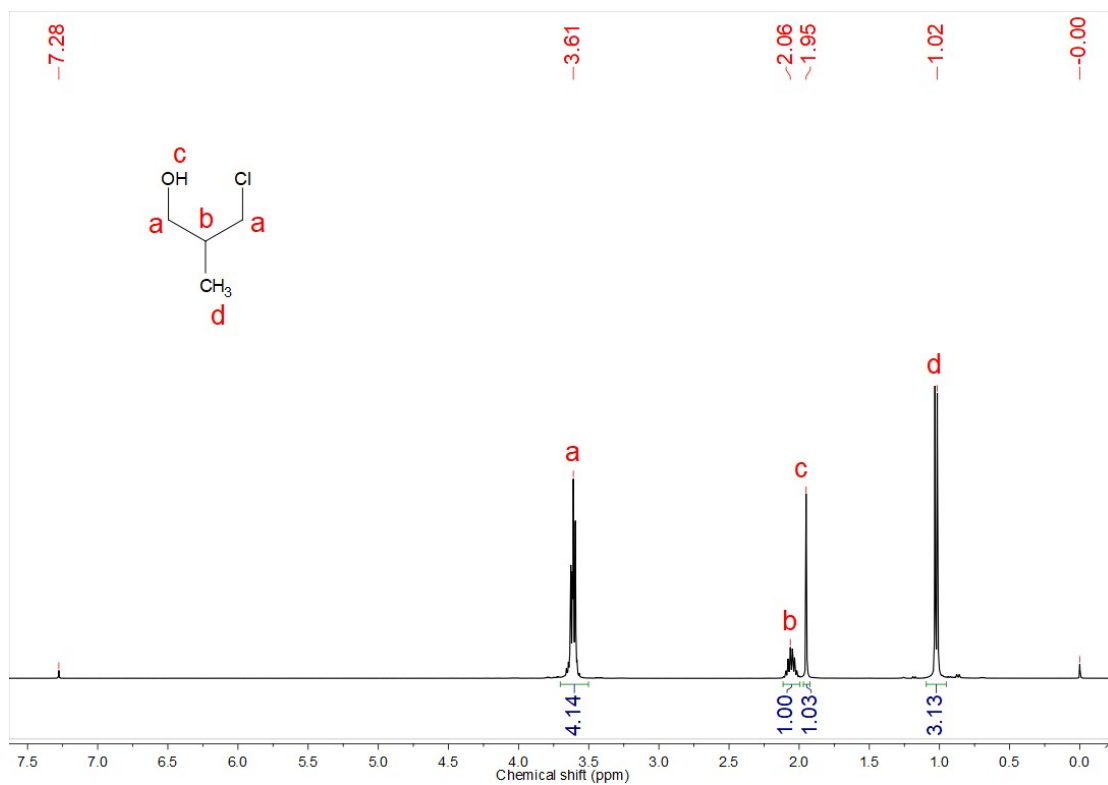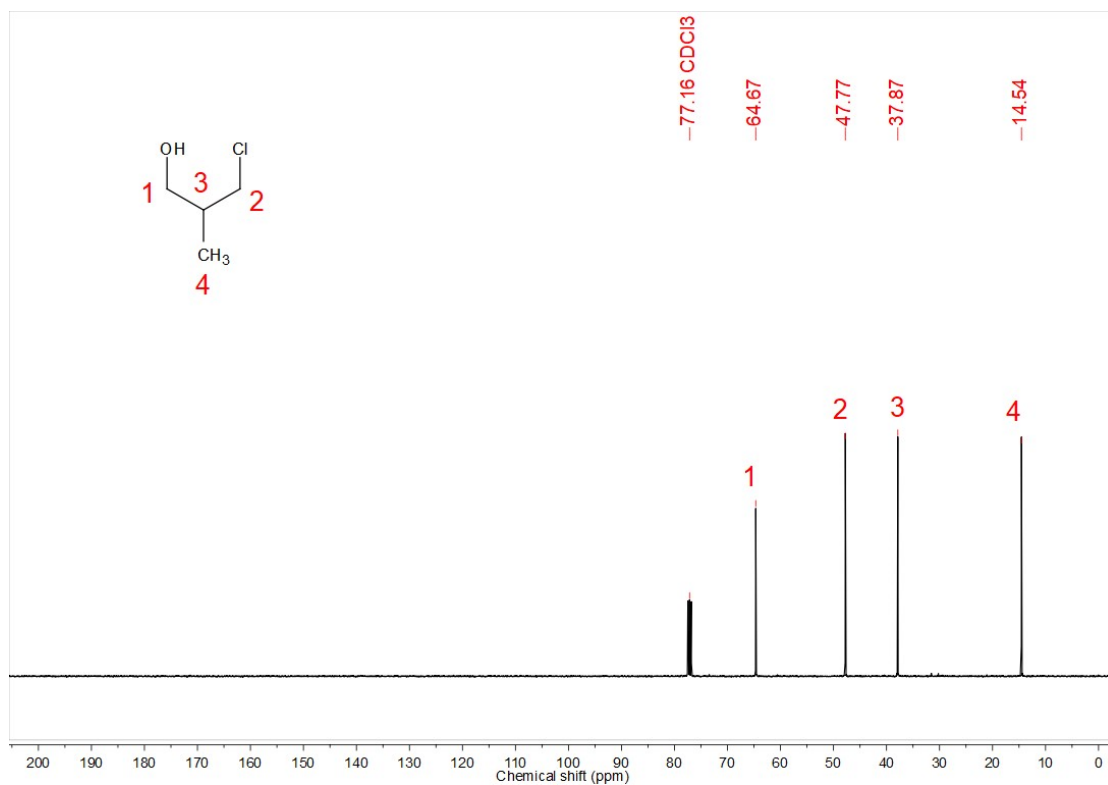



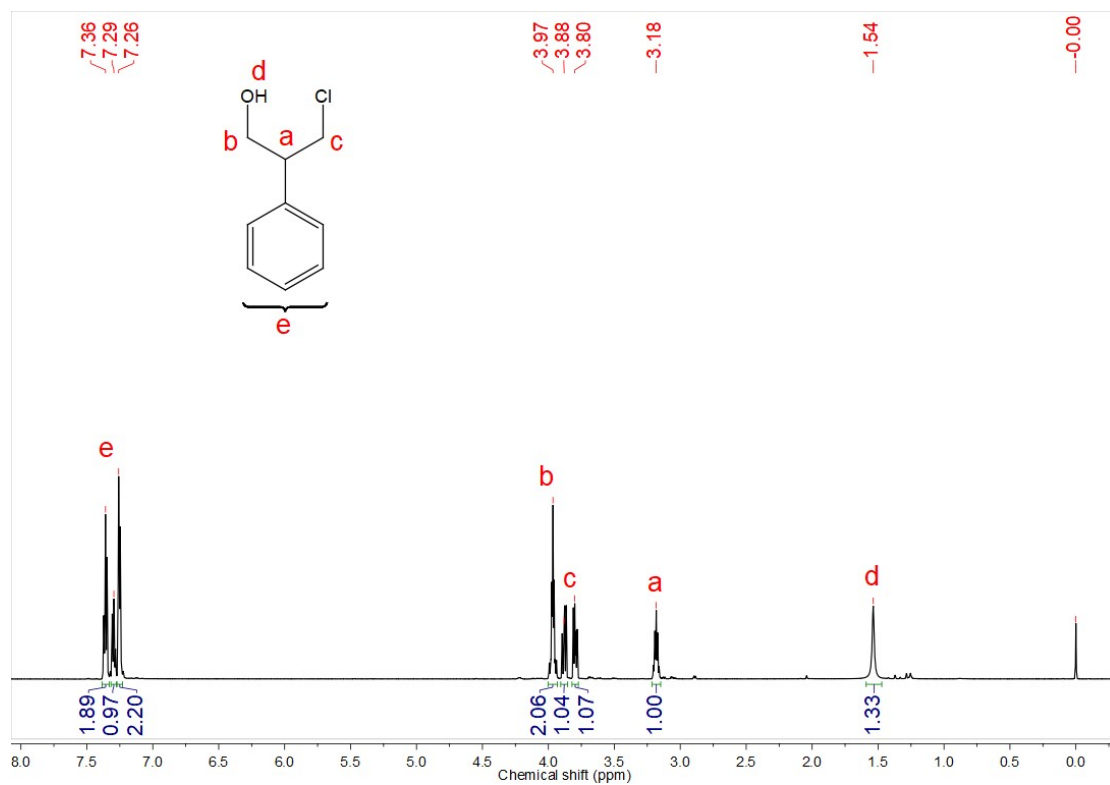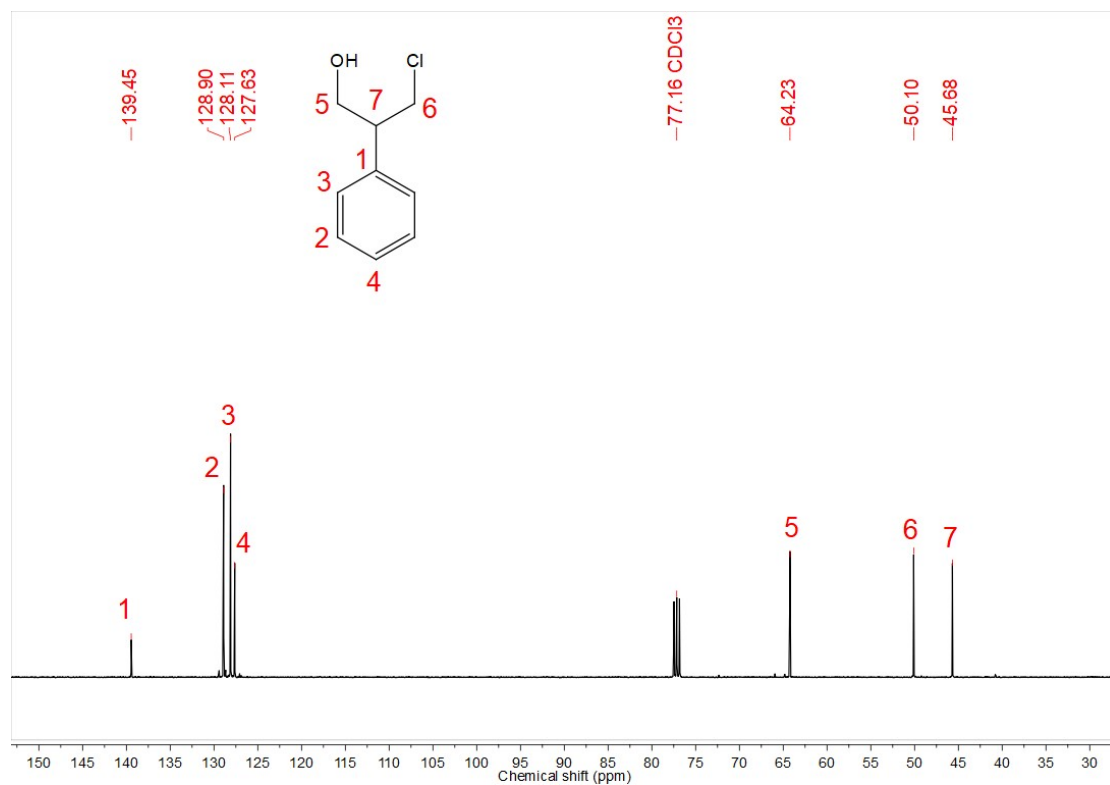

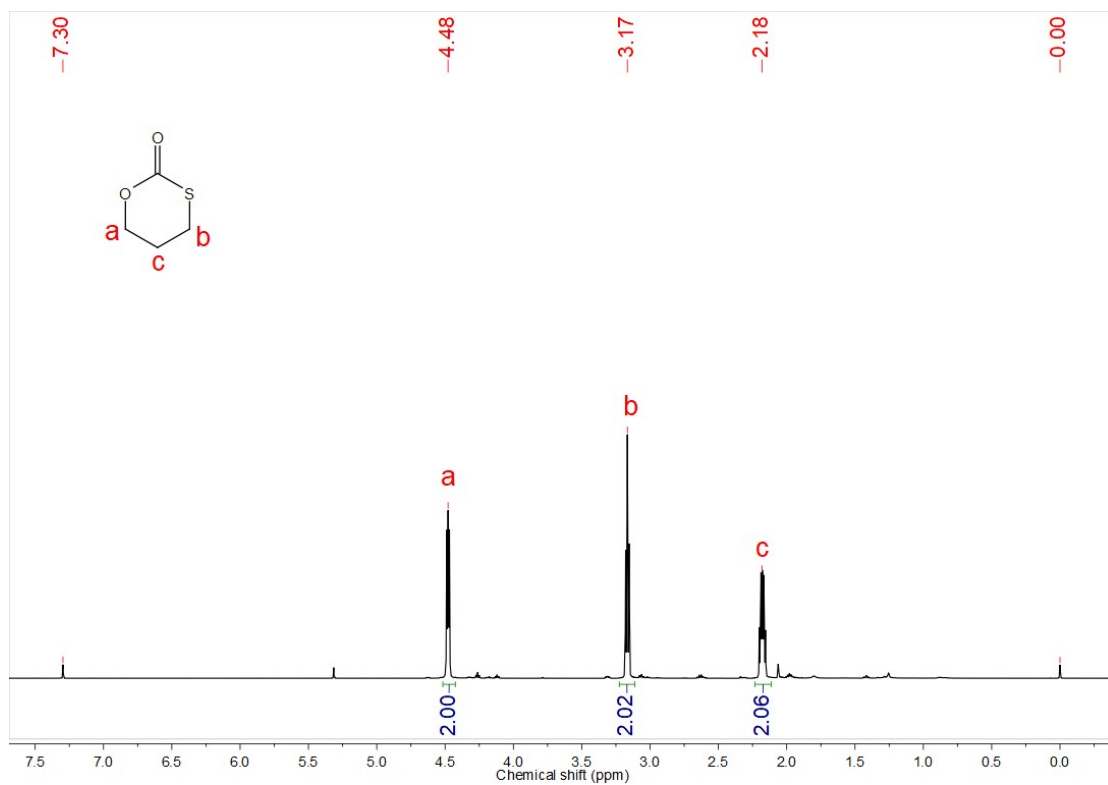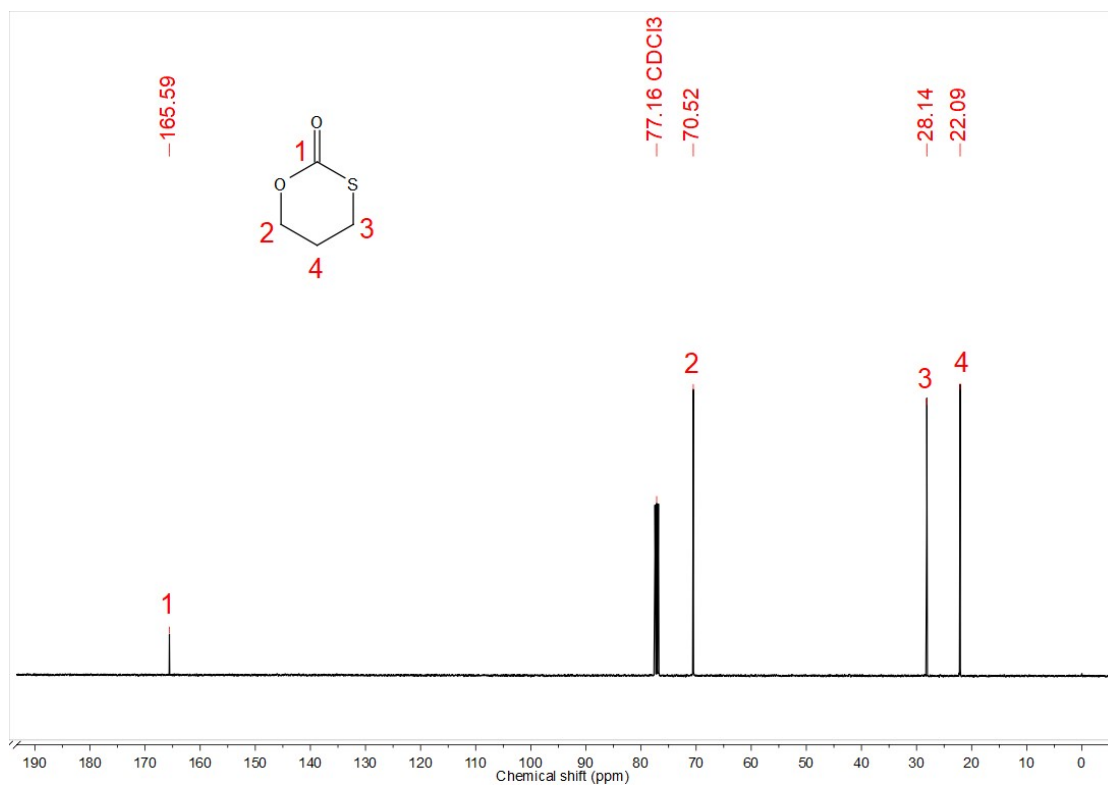

| Fragmentor Voltage | Collision Energy | Ionization Mode |
|--------------------|------------------|-----------------|
| 100                | 0                | ESI             |

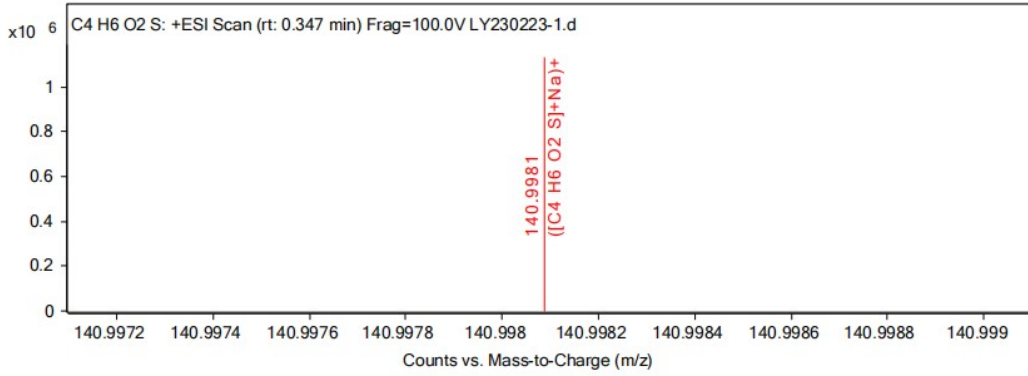

**Formula Calculator Element Limits**

| Element | Min | Max |
|---------|-----|-----|
| C       | 0   | 50  |
| H       | 0   | 100 |
| O       | 0   | 10  |
| N       | 0   | 5   |
| S       | 1   | 1   |

**Formula Calculator Results**

| Formula       | Best | Measured Mass | Tgt Mass | Diff (ppm) | Score |
|---------------|------|---------------|----------|------------|-------|
| C4 H6 Na O2 S | True | 140.9981      | 140.9981 | -0.26      | 99.99 |

--- End Of Report ---

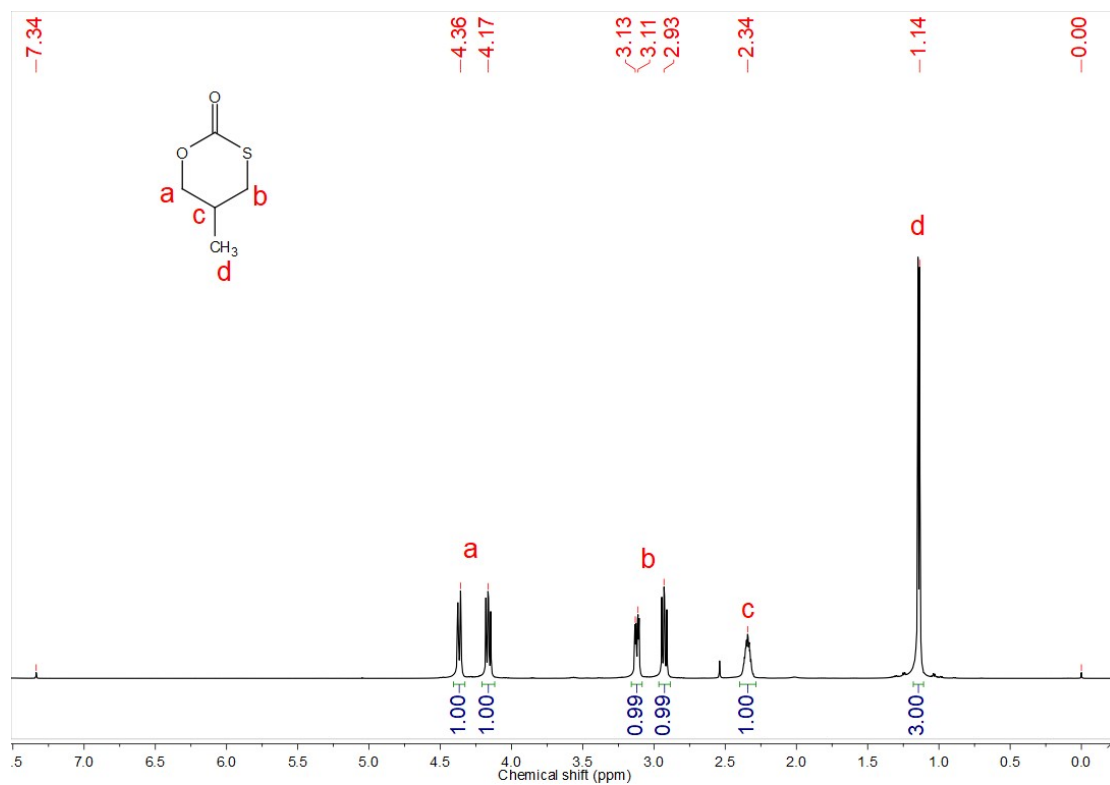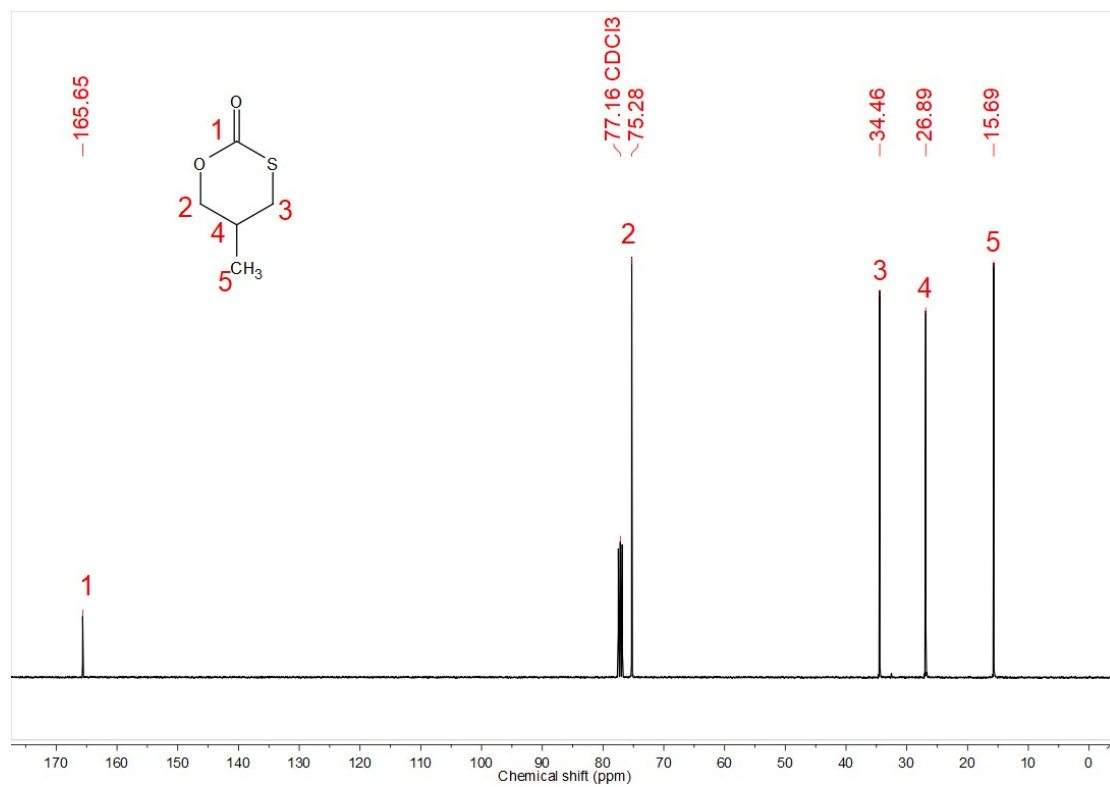

| Fragmentor Voltage | Collision Energy | Ionization Mode |
|--------------------|------------------|-----------------|
| 100                | 0                | ESI             |

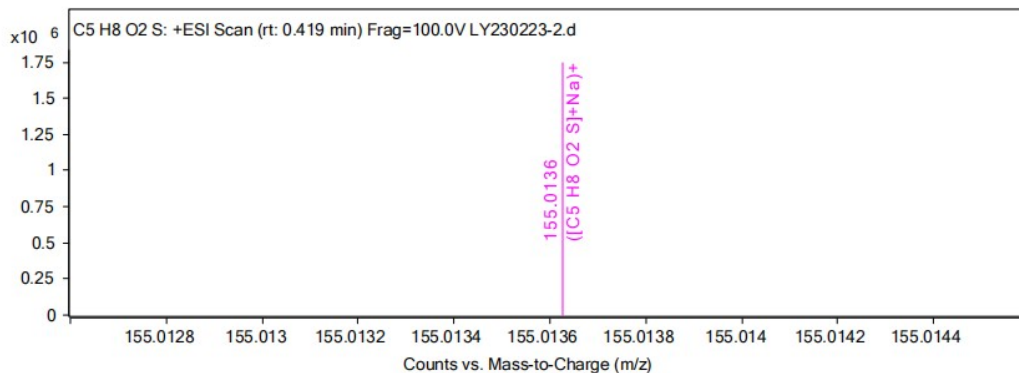

**Formula Calculator Element Limits**

| Element | Min | Max |
|---------|-----|-----|
| C       | 0   | 50  |
| H       | 0   | 100 |
| O       | 0   | 10  |
| N       | 0   | 5   |
| S       | 1   | 1   |

**Formula Calculator Results**

| Formula       | Best | Measured Mass | Tgt Mass | Diff (ppm) | Score |
|---------------|------|---------------|----------|------------|-------|
| C5 H8 Na O2 S | True | 155.0136      | 155.0137 | -0.41      | 99.96 |

-- End Of Report --

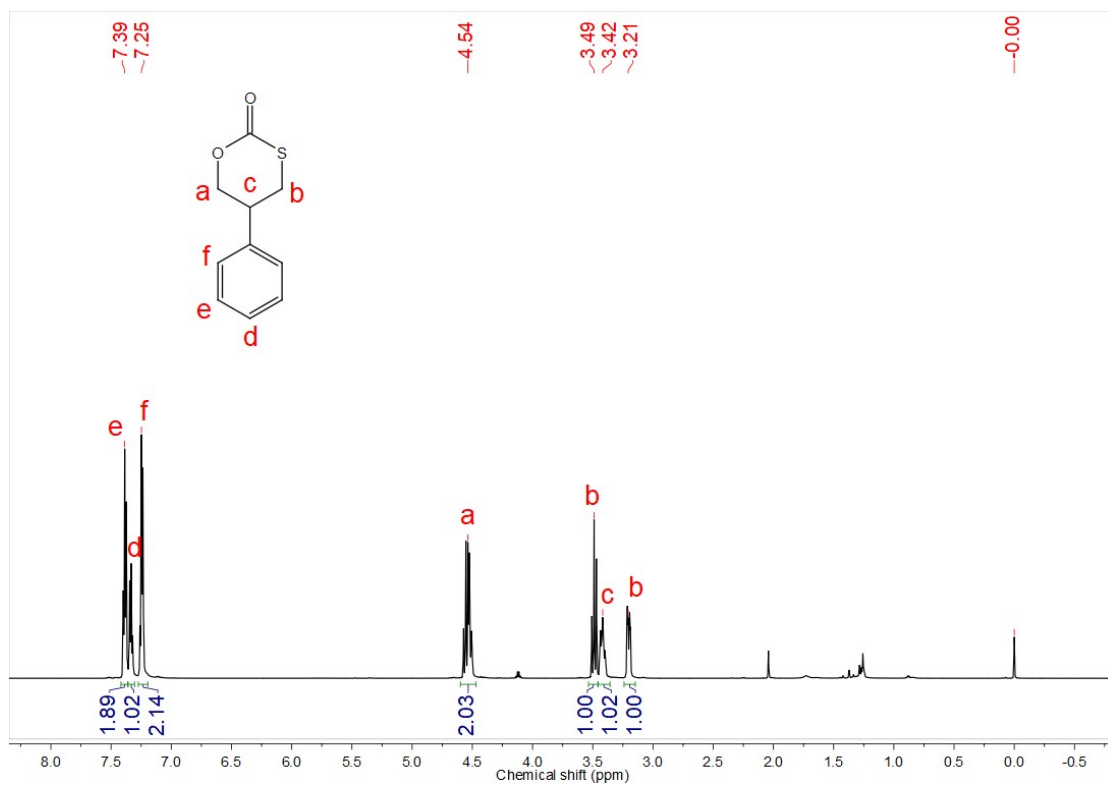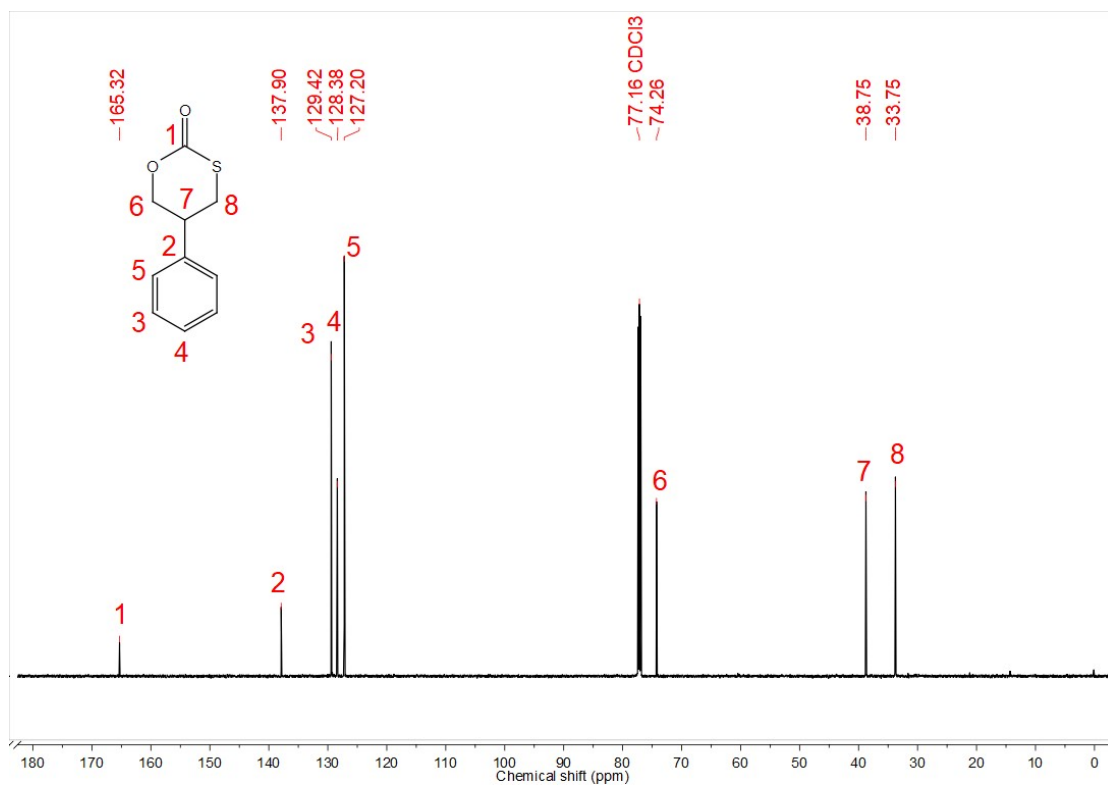

**Fragmentor Voltage**      **Collision Energy**      **Ionization Mode**  
 100                              0                              ESI

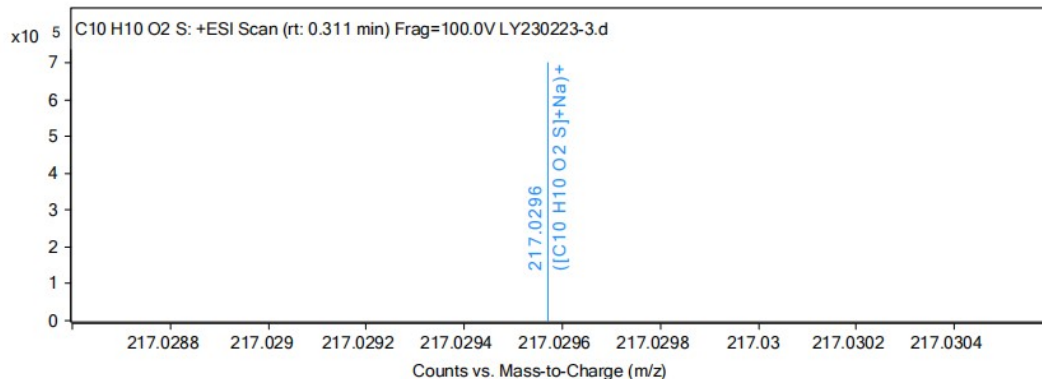

**Formula Calculator Element Limits**

| Element | Min | Max |
|---------|-----|-----|
| C       | 0   | 50  |
| H       | 0   | 100 |
| O       | 0   | 10  |
| N       | 0   | 5   |
| S       | 1   | 1   |

**Formula Calculator Results**

| Formula         | Best | Measured Mass | Tgt Mass | Diff (ppm) | Score |
|-----------------|------|---------------|----------|------------|-------|
| C10 H10 Na O2 S | True | 217.0296      | 217.0294 | -1.07      | 99.58 |

--- End Of Report ---

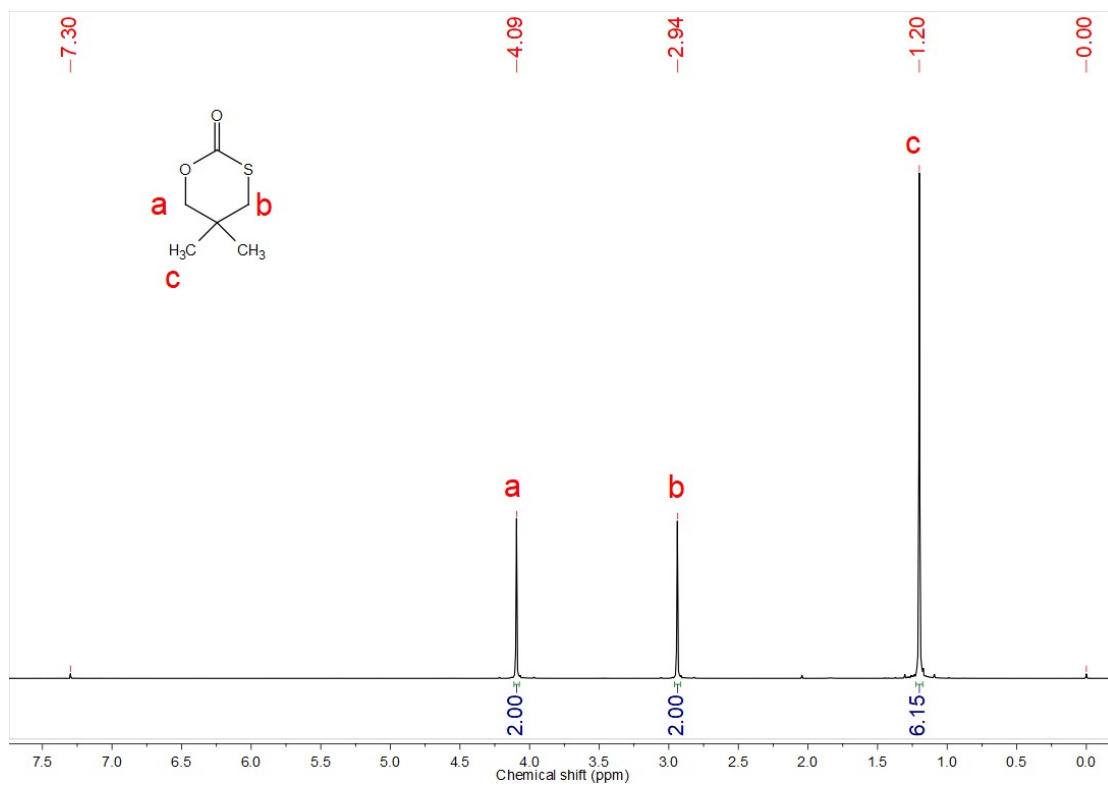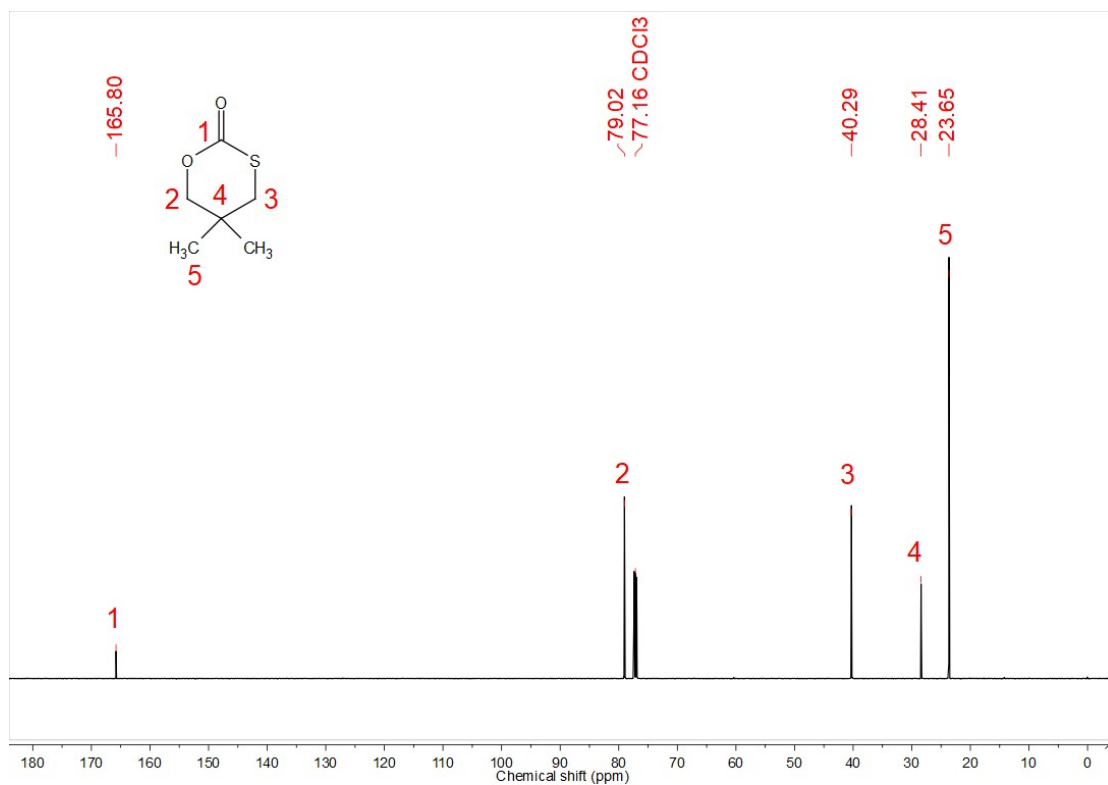



| Fragmentor Voltage | Collision Energy | Ionization Mode |
|--------------------|------------------|-----------------|
| 100                | 0                | ESI             |

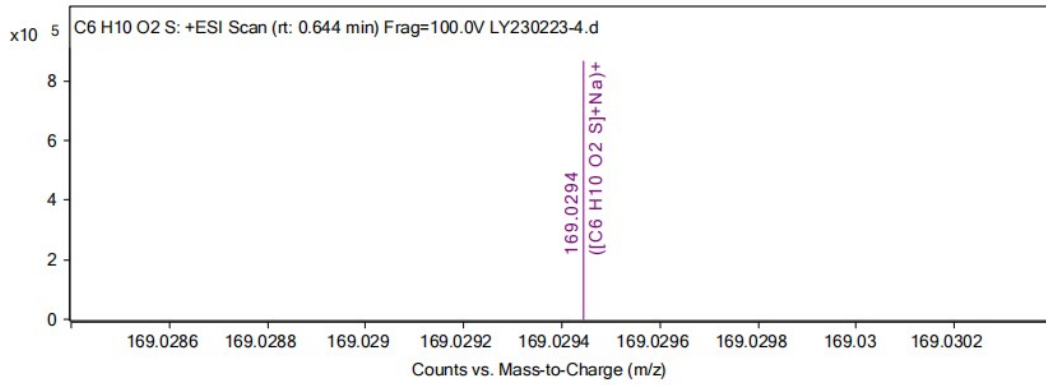

**Formula Calculator Element Limits**

| Element | Min | Max |
|---------|-----|-----|
| C       | 0   | 50  |
| H       | 0   | 100 |
| O       | 0   | 10  |
| N       | 0   | 5   |
| S       | 1   | 1   |

**Formula Calculator Results**

| Formula        | Best | Measured Mass | Tgt Mass | Diff (ppm) | Score |
|----------------|------|---------------|----------|------------|-------|
| C6 H10 Na O2 S | True | 169.0294      | 169.0294 | -0.71      | 99.88 |

--- End Of Report ---

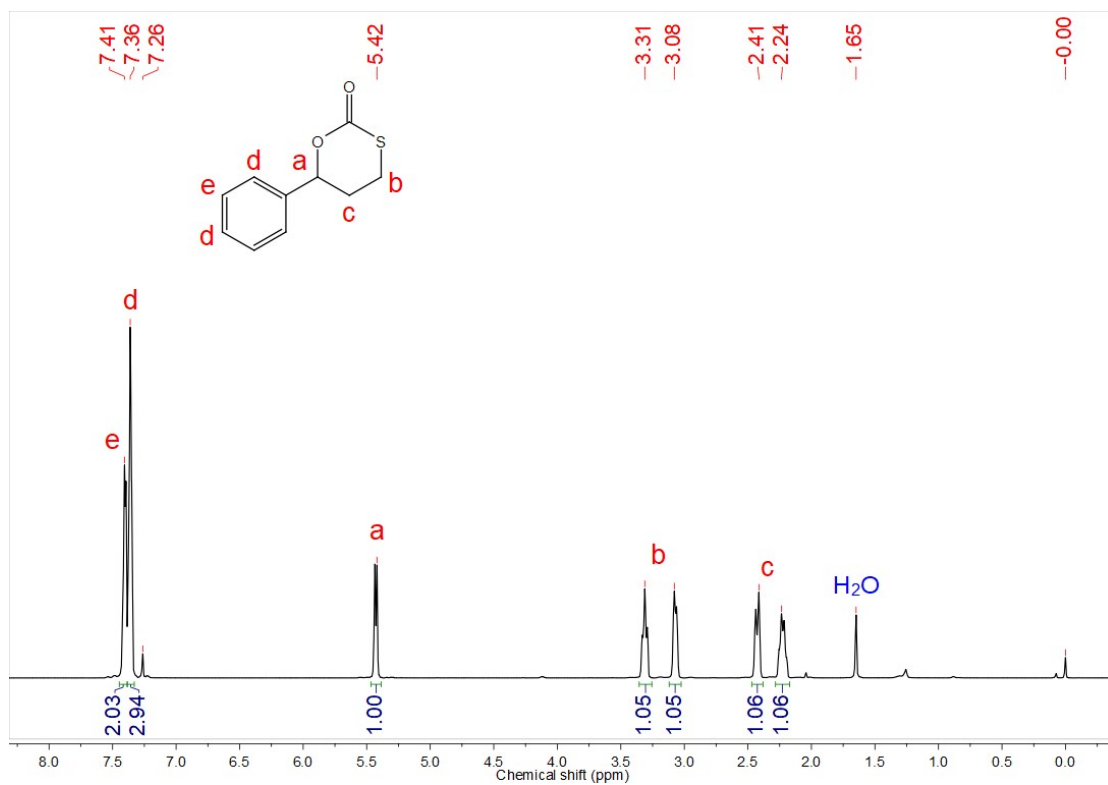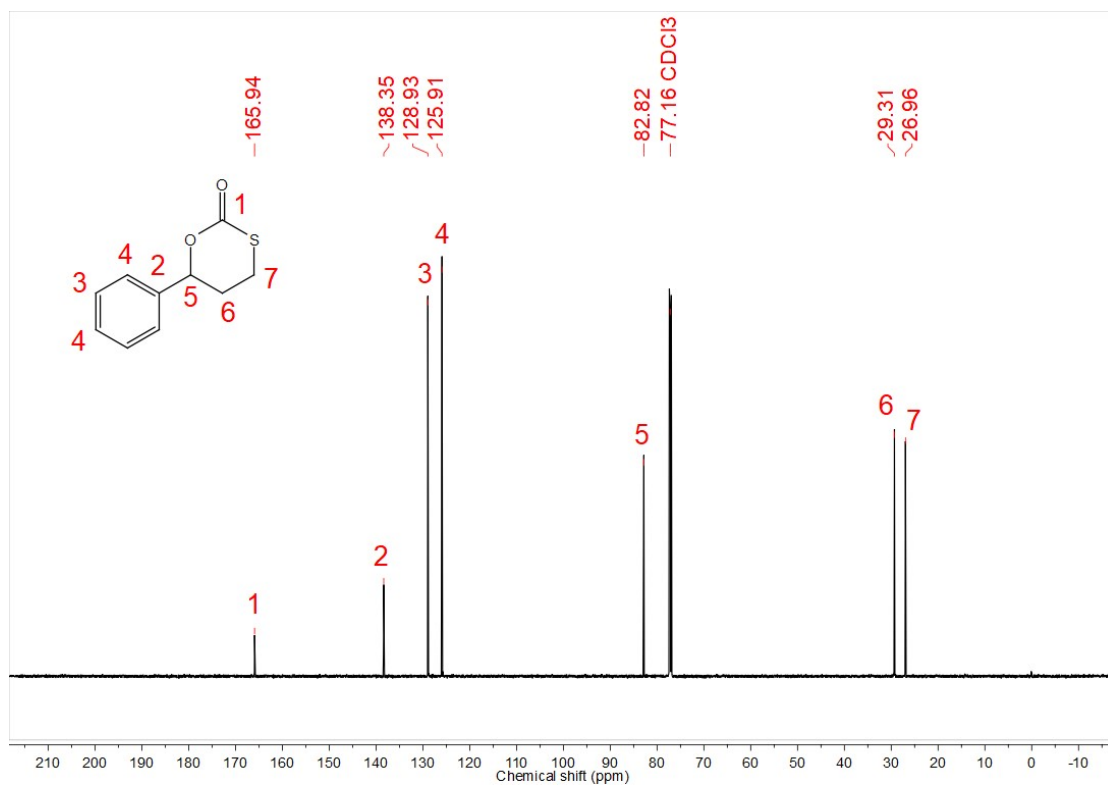

**Fragmentor Voltage**      **Collision Energy**      **Ionization Mode**  
 100                              0                              ESI

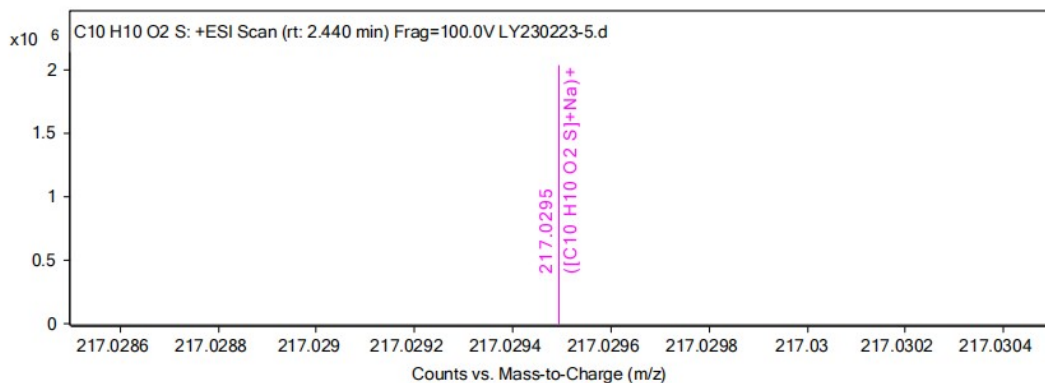

**Formula Calculator Element Limits**

| Element | Min | Max |
|---------|-----|-----|
| C       | 0   | 50  |
| H       | 0   | 100 |
| O       | 0   | 10  |
| N       | 0   | 5   |
| S       | 1   | 1   |

**Formula Calculator Results**

| Formula         | Best | Measured Mass | Tgt Mass | Diff (ppm) | Score |
|-----------------|------|---------------|----------|------------|-------|
| C10 H10 Na O2 S | True | 217.0295      | 217.0294 | -0.83      | 99.75 |

-- End Of Report --
